# Supplementary material for: Physical activity and incident asthma in adults: the HUNT Study, Norway
Source: PubMed Central journal article supplement — BMJ Open. 2016 Nov 18;6(11):e013856. doi: 10.1136/bmjopen-2016-013856 (PMC5128830; doi:10.1136/bmjopen-2016-013856), 2016-11-18
Supplement: bmjopen-2016-013856supp_tables.pdf [file bmjopen-2016-013856supp_tables.pdf]

## Supplementary tables

### Physical activity and incident asthma in adults: The HUNT Study

Ben M. Brumpton, PhD<sup>1, 2, 3\*</sup>, Arnulf Langhammer, MD, PhD<sup>1</sup>, Manuel A. R. Ferreira, PhD<sup>2</sup>, Yue Chen, MD, PhD<sup>4</sup> and Xiao-Mei Mai, MD, PhD<sup>1</sup>

<sup>1</sup>Department of Public Health and General Practice, Faculty of Medicine, Norwegian University of Science and Technology, Trondheim, Norway.

<sup>2</sup>QIMR Berghofer Medical Research Institute, Brisbane, Australia.

<sup>3</sup>Department of Thoracic and Occupational Medicine, St. Olavs Hospital, Trondheim University Hospital, Trondheim, Norway

<sup>4</sup>School of Epidemiology, Public Health and Preventive Medicine, Faculty of Medicine, University of Ottawa, Ottawa, Canada.

**\*Corresponding author:** Ben M. Brumpton, Department of Public Health and General Practice, Norwegian University of Science and Technology (NTNU), Postbox 8905, MTF5, NO-7491 Trondheim, Norway.

E-mail: [ben.brumpton@ntnu.no](mailto:ben.brumpton@ntnu.no)

Phone: +47 73597564

Fax: +47 73597577

Supplementary Table 1. The association between physical activity at baseline and incident asthma in the Nord-Trøndelag Health Study, Norway, 1995-97 to 2006-08 (n=17,477), using a stricter definition of asthma: *i.e.* self-reported asthma and use of asthma medication at follow-up, without report of attacks of wheezing at baseline versus the reference group with no asthma and no wheeze at baseline or follow-up.

| Level of physical activity |       |       | Model 1 |           | Model 2 |           | Model 3 |           |
|----------------------------|-------|-------|---------|-----------|---------|-----------|---------|-----------|
|                            | n     | cases | OR      | 95% CI    | OR      | 95% CI    | OR      | 95% CI    |
| Inactive                   | 862   | 24    | Ref.    |           | Ref.    |           | Ref.    |           |
| Very low                   | 3643  | 93    | 0.91    | 0.59-1.47 | 0.98    | 0.63-1.58 | 0.98    | 0.63-1.58 |
| Low                        | 4380  | 107   | 0.87    | 0.57-1.4  | 1.01    | 0.66-1.63 | 1.02    | 0.65-1.64 |
| Moderate                   | 6332  | 149   | 0.84    | 0.55-1.33 | 1.02    | 0.67-1.63 | 1.02    | 0.66-1.63 |
| High                       | 2260  | 53    | 0.84    | 0.52-1.39 | 1.11    | 0.68-1.85 | 1.11    | 0.68-1.85 |
| Any activity               | 17477 | 426   | 0.87    | 0.58-1.35 | 1.02    | 0.68-1.6  | 1.02    | 0.68-1.6  |

The 11-year cumulative incidence of asthma was calculated according to PA.

CI: confidence interval, n: number of observations, OR: odds ratio.

#Model 1: Crude

¶Model 2: Adjusted age, BMI, sex, smoking status, education, family history of asthma, social benefit and economic difficulties.

†Model 3: Adjusted age, BMI, sex, smoking status, education, family history of asthma, social benefit, economic difficulties and allergic rhinitis.

Supplementary Table 2. The association between change in physical activity prior to baseline and incident asthma in the Nord-Trøndelag Health Study, Norway, 1984-86 to 2006-08 (n=11,736), using a stricter definition of asthma: *i.e.* self-reported asthma and use of asthma medication at follow-up, without report of attacks of wheezing at baseline versus the reference group with no asthma and no wheeze at baseline or follow-up.

| Level of physical activity |       |       | Model 1 <sup>#</sup> |           | Model 2 <sup>¶</sup> |           | Model 3 <sup>+</sup> |           |
|----------------------------|-------|-------|----------------------|-----------|----------------------|-----------|----------------------|-----------|
|                            | n     | cases | OR                   | 95% CI    | OR                   | 95% CI    | OR                   | 95% CI    |
| Inactive                   | 130   | 4     | Ref.                 |           | Ref.                 |           | Ref.                 |           |
| Active survey 1 only       | 341   | 8     | 0.76                 | 0.23-2.88 | 0.73                 | 0.22-2.78 | 0.77                 | 0.23-2.95 |
| Active survey 2 only       | 738   | 13    | 0.56                 | 0.2-2.03  | 0.61                 | 0.21-2.21 | 0.64                 | 0.22-2.32 |
| Active both                | 10527 | 259   | 0.79                 | 0.33-2.6  | 0.94                 | 0.39-3.1  | 0.97                 | 0.4-3.22  |
| Any activity               | 11606 | 280   | 0.78                 | 0.33-2.55 | 0.91                 | 0.37-2.98 | 0.93                 | 0.38-3.09 |

The 11-year cumulative incidence of asthma was calculated according to PA.

CI: confidence interval, n: number of observations, OR: odds ratio.

<sup>#</sup>Model 1: Crude

<sup>¶</sup>Model 2: Adjusted age, BMI, sex, smoking status, education, family history of asthma, social benefit and economic difficulties.

<sup>+</sup>Model 3: Adjusted age, BMI, sex, smoking status, education, family history of asthma, social benefit, economic difficulties and allergic rhinitis.

Supplementary Table 3. The association between physical activity at baseline and incident asthma in the Nord-Trøndelag Health Study, Norway, 1995-97 to 2006-08 (n=16,079), excluded participants who reported wheezing, breathlessness or cough daily during the last 12 months in HUNT2.

| Level of physical activity |       |       | Model 1 |           | Model 2 |           | Model 3 |           |
|----------------------------|-------|-------|---------|-----------|---------|-----------|---------|-----------|
|                            | n     | cases | OR      | 95% CI    | OR      | 95% CI    | OR      | 95% CI    |
| Inactive                   | 777   | 25    | Ref.    |           | Ref.    |           | Ref.    |           |
| Very low                   | 3342  | 95    | 0.88    | 0.57-1.41 | 0.93    | 0.6-1.49  | 0.92    | 0.59-1.48 |
| Low                        | 4002  | 99    | 0.76    | 0.5-1.22  | 0.85    | 0.55-1.37 | 0.86    | 0.55-1.38 |
| Moderate                   | 5857  | 137   | 0.72    | 0.48-1.14 | 0.85    | 0.56-1.35 | 0.85    | 0.55-1.35 |
| High                       | 2101  | 57    | 0.84    | 0.53-1.37 | 1.08    | 0.67-1.78 | 1.09    | 0.68-1.80 |
| Any activity               | 16079 | 413   | 0.78    | 0.53-1.21 | 0.90    | 0.60-1.40 | 0.90    | 0.60-1.40 |

The 11-year cumulative incidence of asthma was calculated according to PA. Incident asthma was defined from the survey questionnaires as those who did not report ever asthma at HUNT2 (1995-97) but reported asthma at HUNT3 (2006-08).

CI: confidence interval, n: number of observations, OR: odds ratio.

<sup>#</sup>Model 1: Crude

<sup>¶</sup>Model 2: Adjusted age, BMI, sex, smoking status, education, family history of asthma, social benefit and economic difficulties.

<sup>+</sup>Model 3: Adjusted age, BMI, sex, smoking status, education, family history of asthma, social benefit, economic difficulties and allergic rhinitis.

Supplementary Table 4. The association between physical activity at baseline and incident asthma in the Nord-Trøndelag Health Study, Norway, 1995-97 to 2006-08 (n=10,397), excluded participants who reported wheezing, breathlessness or daily cough during the last 12 months in HUNT2 or those reporting normally coughing in the morning or normally expectorating phlegm from their chest in the morning in HUNT1.

| Level of physical activity |       |       | Model 1 <sup>#</sup> |           | Model 2 <sup>¶</sup> |           | Model 3 <sup>+</sup> |           |
|----------------------------|-------|-------|----------------------|-----------|----------------------|-----------|----------------------|-----------|
|                            | n     | cases | OR                   | 95% CI    | OR                   | 95% CI    | OR                   | 95% CI    |
| Inactive                   | 105   | 4     | Ref.                 |           | Ref.                 |           | Ref.                 |           |
| Active survey 1 only       | 293   | 5     | 0.44                 | 0.11-1.8  | 0.44                 | 0.11-1.82 | 0.49                 | 0.12-2.05 |
| Active survey 2 only       | 630   | 13    | 0.53                 | 0.18-1.92 | 0.59                 | 0.2-2.16  | 0.64                 | 0.22-2.37 |
| Active both                | 9369  | 236   | 0.65                 | 0.27-2.14 | 0.8                  | 0.33-2.67 | 0.87                 | 0.35-2.91 |
| Any activity               | 10292 | 254   | 0.64                 | 0.27-2.1  | 0.77                 | 0.31-2.56 | 0.83                 | 0.33-2.79 |

The 11-year cumulative incidence of asthma was calculated according to PA. Incident asthma was defined from the survey questionnaires as those who did not report ever asthma at HUNT2 (1995-97) but reported asthma at HUNT3 (2006-08).

CI: confidence interval, n: number of observations, OR: odds ratio.

<sup>#</sup>Model 1: Crude

<sup>¶</sup>Model 2: Adjusted age, BMI, sex, smoking status, education, family history of asthma, social benefit and economic difficulties.

<sup>+</sup>Model 3: Adjusted age, BMI, sex, smoking status, education, family history of asthma, social benefit, economic difficulties and allergic rhinitis.
